# Supplementary material
Source: Springer Nature journal article supplement (http://www.nature.com/nature/journal/v428/n6983/extref/S7_DupBlocks/scer_pairs_04.pdf)

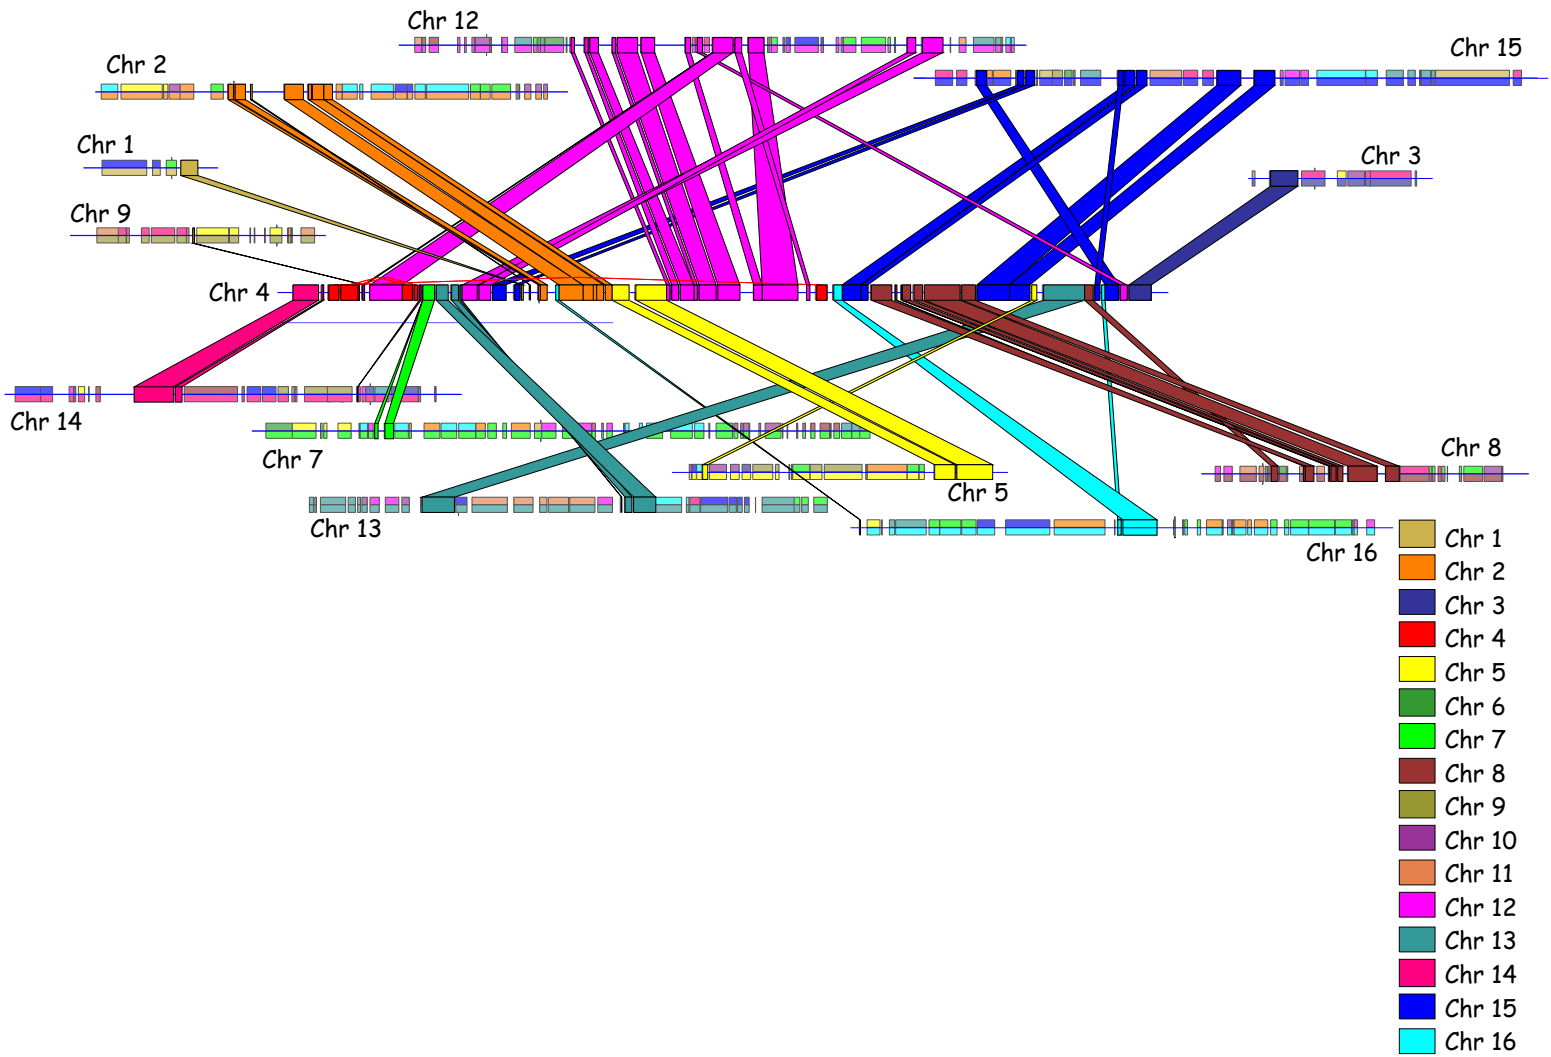

Supplement: scer_pairs_04.pdf [file scer_pairs_04.pdf]
